# Supplementary material for: Epidemic models characterize seizure propagation and the effects of epilepsy surgery in individualized brain networks based on MEG and invasive EEG recordings
Source: PubMed Central journal article supplement (PMC8904850; doi:10.1038/s41598-022-07730-2), 2022-03-08
Supplement: 41598_2022_7730_MOESM1_ESM.pdf [file 41598_2022_7730_MOESM1_ESM.pdf]

# Supplementary Information of “Epidemic models characterize seizure propagation and the effects of epilepsy surgery in individualized brain networks based on MEG and invasive EEG recordings”

Ana. P. Millán<sup>1</sup>, Elisabeth C.W. van Straaten<sup>1</sup>, Cornelis J. Stam<sup>1</sup>, Ida A. Nissen<sup>1</sup>, Sander Idema<sup>2</sup>, Johannes C. Baayen<sup>2</sup>, Piet Van Mieghem<sup>3</sup>, and Arjan Hillebrand<sup>1</sup>

<sup>1</sup>Department of Clinical Neurophysiology and MEG Center, Amsterdam Neuroscience, Vrije Universiteit Amsterdam, Amsterdam UMC, Amsterdam, The Netherlands

<sup>2</sup>Department of Neurosurgery, Amsterdam Neuroscience, Vrije Universiteit Amsterdam, Amsterdam UMC, Amsterdam, The Netherlands

<sup>3</sup>Faculty of Electrical Engineering, Mathematics and Computer Science, Delft University of Technology, Delft, The Netherlands

## 1 Surrogates for structural networks: Exponential Distance Rule

In this study we considered AEC-MEG networks as surrogate for structural networks. In order to validate this choice, since DTI information is not available for this patient cohort, we compared the AEC-MEG networks with a well-validated model for structural connectivity: the Exponential Distance Rule (EDR) network. Based on animal studies, the EDR specifies that the weights of structural connections in the brain,  $w_{ij}$ , decay exponentially with distance  $d_{ij}$  [1–3], i.e.  $w_{ij} \sim \exp(-\alpha d_{ij})$ , where  $\alpha$  is the decay exponent. Recent studies have repeatedly found that the EDR also reproduces human DTI data well [4–6]. Thus, we compared AEC-MEG networks to those generated with the EDR for our 10-patient cohort by calculating the Pearson’s Correlation coefficient between the matrix entries (see figure S1). We found that the AEC-MEG networks were well fitted ( $R^2 = 0.50$ ) by the EDR rule with decay-exponent  $\alpha = 0.052$ . This demonstrates that MEG-AEC networks capture the main elements of structural connectivity.

## 2 Optimization of virtual resections

For a given resection size  $S_{\mathcal{R}}$  (number of resected nodes), the optimal virtual resection  $\mathcal{R}^*(S_{\mathcal{R}})$  is the one that creates the largest reduction in seizure propagation,  $\Delta_{\mathcal{R}}^*(S_{\mathcal{R}})$ . Because characterizing all possible virtual resections is a combinatorial problem that soon loses tractability, alternative approaches are necessary to find the optimal solution. Therefore, in order to alleviate the exploration of the parameter space, we defined a random search method that combined structural and dynamical information, and made use of a simulated annealing algorithm. The method considers a surrogate topological measure for the SI dynamics, which is used to fasten up the exploration of the space of virtual resections, and the solutions are subsequently refined using the actual SI dynamics. The optimization method is described in detail below, and a schematic view is given in figure S2.

### 2.1 Surrogate model

In the SI model, the probability that the infection has reached a certain node  $i$  at a given time  $t$  decays in an approximate linear manner with  $d_i^{\text{seed}}$ [7], where  $d_i^{\text{seed}}$  is the average distance from the considered node to the seed (see figure S2). That is,

$$d_i^{\text{seed}} = S_{\text{seed}}^{-1} \sum_{j \in \text{seed}} d_{ij}, \quad (\text{S1})$$

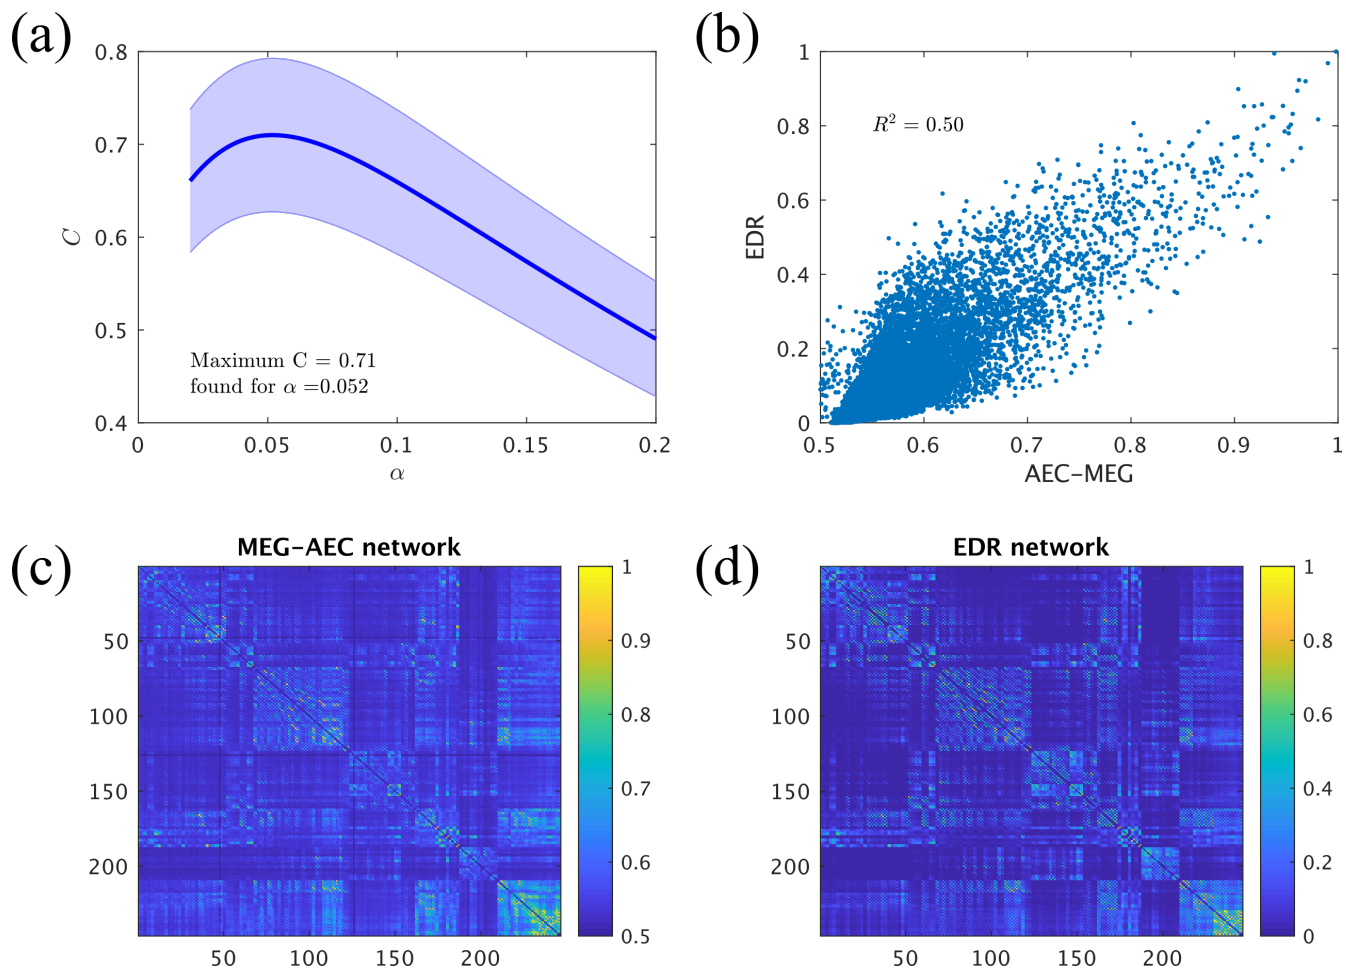

Figure S1: **Validation of AEC-MEG networks as surrogates for structural connectivity.** **a)** Average Correlation between AEC-MEG and EDR networks for a range of exponent  $\alpha$  values. The shaded areas indicate the standard deviation between the patients. The maximum correlation found is  $C = 0.71$  for  $\alpha = 0.052$ . **b)** Illustration of the correlation analysis for the optimal  $\alpha$ . To calculate  $C$ , the matrices are linearized by stacking one column after another, and the standard Pearson's Correlation coefficient is computed. **c)** Average MEG-AEC network for the patient cohort. **d)** Average EDR network for the patient cohort corresponding to the optimal  $\alpha$  value.

where  $d_{ij}$  is the topological distance between the pair of nodes  $(i, j)$  and  $S_{\text{seed}}$  is the number of nodes in the seed region.  $d_{ij}$  is defined as

$$d_{ij} = \sum_{k \in \ell_{ij}} \ln\left(\frac{w_k}{w_0}\right), \quad (\text{S2})$$

where the sum is over the edges in the shortest path between nodes  $i$  and  $j$ ,  $w_k$  is the weight of edge  $k$  and  $w_0$  is the minimum non-zero weight, introduced for normalization purposes [7]. The average distance to the seed,  $d^{\text{seed}} = (N - S_{\text{seed}})^{-1} \sum_i d_i^{\text{seed}}$ , where the sum is over nodes that do not belong to the seed and  $N = 246$  is the total number of nodes in the network (i.e. the number of ROIs), can be used as a topological proxy for the propagation of the SI dynamics. The topological measure that quantifies the effect of a given virtual resection is thus the increase in the average distance to the seed:

$$\Delta\mathcal{R}_{\mathcal{T}} = d_{\mathcal{R}}^{\text{seed}} - d^{\text{seed}}. \quad (\text{S3})$$

## 2.2 Optimization method

In order to find optimal resection strategies, and considering the strong non-linearities present in the model, we have made use of a probabilistic optimization algorithm, the *Simulated Annealing* (SA) algorithm [8], to optimize the effect of virtual resections, for a given number of resected nodes. In order to do so, we employed a four-step method to find, for each resection size  $S$  up to the size of the resection area,  $S_{\text{RA}}$ , the resection leading to the maximum decrease in seizure propagation (see figure S2):

1. Firstly, we considered the surrogate model, and used the SA algorithm to maximize  $\Delta\mathcal{R}_{\mathcal{T}}$ . The SA algorithm is probabilistic, and was therefore run 10 times, yielding a set of surrogate solutions  $\mathcal{R}_{\mathcal{T}}^k$ , with  $k = 1, \dots, 10$ , each characterized by its topological effect  $\Delta\mathcal{R}_{\mathcal{T}}^k$ , as shown in figure S2a. Figure S3 shows an exemplary case of the SA optimization search.
2. The topological metric  $\Delta\mathcal{R}_{\mathcal{T}}$  is only an approximation of the actual effect each resection  $\mathcal{R}$  has on the propagation dynamics. Consequently, for each surrogate solution  $\mathcal{R}_{\mathcal{T}}^k$ , its actual effect was then determined by estimating  $I_{\mathcal{R}_{\mathcal{T}}^k}^k(t_0)$  (figure S2b), i.e. seizure propagation on the network once the virtual resection has taken place.
3. The optimal topological resection of size  $S$ ,  $\mathcal{R}_{\mathcal{T}}^*(S)$ , was defined as the one leading to the maximum decrease in epidemic spreading (figure S2c).
4. Finally, we made use of the SA algorithm again: the optimal topological resection  $\mathcal{R}_{\mathcal{T}}^*(S)$  was used as the initial condition for the search. This time, the algorithm was used to minimize  $I_{\mathcal{R}}(t_0)$  directly (see figure S2d). This yielded the final optimal resection  $\mathcal{R}^*(S)$ , with propagation  $I_{\mathcal{R}}^*(S)$ .

This method was iterated from  $S = 1$  up to the size of the resection area,  $S = S_{\text{RA}}$ . Overall, this method allows for a faster exploration of the parameter space (using the surrogate model), and a posterior refinement of the solution using the seizure propagation model.

## 2.3 SA Algorithm

We used a MATLAB implementation of the Simulated Annealing (SA) algorithm (J. Vandekerckhove, general simulated annealing algorithm, version 1.0.0.0, MATLAB Central File Exchange), adapted for our model (see figure S3). Starting out with a given selection of nodes for the virtual resection, at each step of the SA algorithm this set is updated by changing  $n$  of the nodes.  $n$  follows a power-law distribution to allow for non-linear exploration of the node-space. This SA algorithm minimizes a cost function, which was defined as the inverse of  $d_{\mathcal{R}}^{\text{seed}}$  for the surrogate case (step 1 in figure S2), and as the fraction of infected nodes at  $t_0$ ,  $I_{\mathcal{R}}(t_0)$  for the final step (step 4 in figure S2).

The other parameters of the algorithm were set to default for step 1: initial temperature = 1, stopping temperature =  $10^{-8}$ , annealing function  $f(T) = 0.8T$ , maximum number of consecutive rejections =  $10^3$ , maximum number of tries within one temperature = 300, maximum number of successes within one temperature = 20. The algorithm was run 10 times with different (random) initial configurations, and the one with the largest effect was selected. For step 4, some parameters were changed to allow for a faster approach to the final solution: stopping temperature

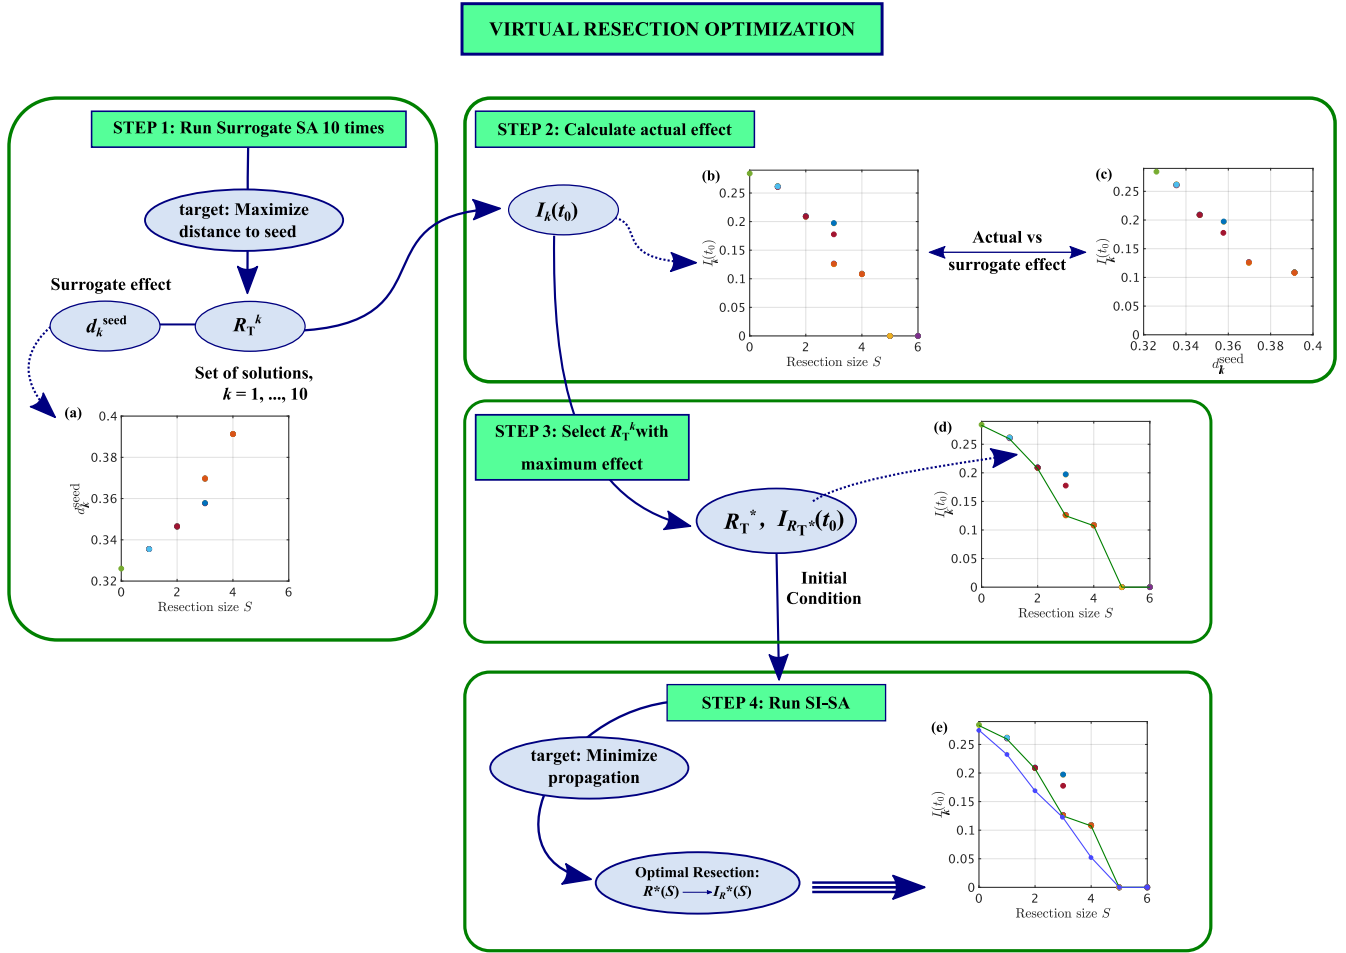

Figure S2: **Schematic representation of the Virtual Resection Optimization Method.** We used a four step optimization approach to find the virtual resection that, for a given resection size, minimized seizure propagation. Firstly (step 1), we used the SA algorithm to find resections that maximized the surrogate measure  $\Delta \mathcal{R}_{\mathcal{T}}$  (eq. S3). The optimization algorithm was iterated 10 times, yielding a set of 10 possible virtual resections,  $\mathcal{R}_{\mathcal{T}}^k(S)$ ,  $k = 1, \dots, 10$ , for each resection size. This is depicted in panel (a), where we show  $d_k^{\text{seed}}$  as found by the SA algorithm for VRs of different sizes. In most cases all solutions had the same  $d_k^{\text{seed}}$  and overlap in the figure. For this case, the seed became completely disconnected for  $S = 5$ , which is 1 node less than the size of the RA. Next (step 2), we calculated the actual effect of each resection  $\mathcal{R}_{\mathcal{T}}^k(S)$ ,  $I_k(t_0)$ , as depicted in panel (b), where we show  $I_k(t_0)$  for those same resections (error bars indicating the standard deviation among 10 iterations of  $10^4$  runs of the SI dynamics overlapped with data points and are not visible). Panel (c) illustrates the relationship between the surrogate and actual effects of each resection, i.e. between the topological measure  $d_k^{\text{seed}}$  and dynamical one  $I_k(t_0)$ , for each VR.  $I(t_0)$  decayed roughly proportionally with  $d_k^{\text{seed}}$  until it saturated and equaled 0 for complete seed isolation (in which case  $d_k^{\text{seed}}$  diverged, not shown here). In step 3, the resection leading to the maximum actual effect for each resection size,  $\mathcal{R}_{\mathcal{T}}^*(S)$ , was selected as shown in panel (d). Finally, for each resection size separately, this resection was used as the initial condition for the SA algorithm to minimize seizure propagation, as measured by  $I_{\mathcal{R}}(t_0)$  (panel (e)). This led to the final optimal resection,  $\mathcal{R}^*(S)$ , characterized by the propagation  $I_{\mathcal{R}^*}(S)$ , for each resection size. In this case, we found that the propagation was stopped for  $S = 5$ .

$= 10^{-6}$ , annealing function  $f(T) = 0.6T$ . In this case the algorithm was only run once for each resection size, using the optimal solution from the surrogate SA method as the seed.

Due to the random nature of the SI dynamics, different realizations with the same seed can lead to different outcomes. The SA algorithm could thus artificially minimize  $I(t_0)$  by selecting realizations that, by chance, have a

## SA - Simulated Annealing

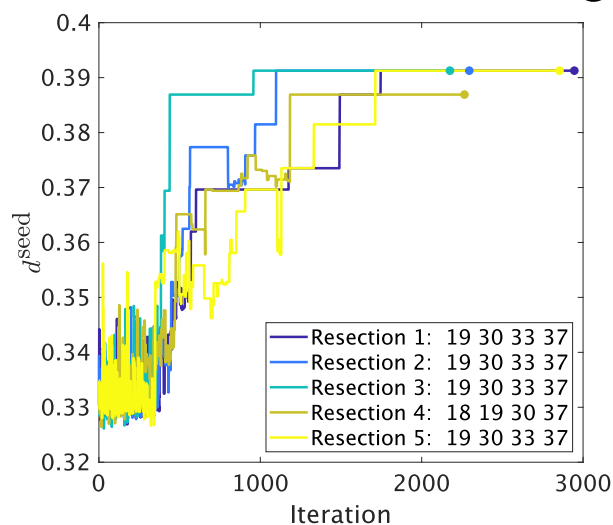

Figure S3: **Surrogate Simulated Annealing.** Here we illustrate the Simulated Annealing (SA) method, for an exemplary VR of size  $S = 4$ , for patient 10. The SA algorithm performs a random search, starting from a random virtual resection, so that at each step a new resection is calculated by switching some of the selected nodes. The new resection is then accepted with a probability that depends on the difference of effect between the resections, so that resections that increase  $d^{\text{seed}}$  have a higher probability of being accepted. This process is iterated until a stable solution is found. Due to its probabilistic nature, different realizations of the algorithm can lead to different outcomes, of which the optimal one is selected. In this case, iterations 1, 2, 3, 5 reached the same resection (target nodes 19, 30, 33, 17) that maximally increased  $d^{\text{seed}}$ .

| Patient    | RA Seed     |          | SOZ Seed    |          | Outcome |
|------------|-------------|----------|-------------|----------|---------|
|            | Correlation | $\kappa$ | Correlation | $\kappa$ |         |
| P1         | 0.48*       | 36.90    | 0.65*       | 14.75    | NSF     |
| P2         | 0.62*       | 24.60    | 0.52*       | 19.68    | SF      |
| P3         | 0.34*       | 14.75    | 0.30*       | 14.75    | NSF     |
| P4         | 0.41*       | 49.20    | 0.53*       | 36.91    | SF      |
| P5         | 0.40*       | 9.84     | 0.49*       | 9.84     | SF      |
| P6         | 0.36*       | 4.92     | 0.53*       | 9.84     | SF      |
| P7         | 0.14        | 4.92     | 0.62*       | 14.75    | SF      |
| P8         | 0.43*       | 49.20    | 0.48*       | 24.60    | NSF     |
| P9         | 0.53*       | 14.75    | 0.53*       | 14.75    | SF      |
| P10        | 0.43*       | 9.85     | 0.48*       | 9.84     | SF      |
| Mean (all) | 0.41        | 21.89    | 0.51        | 16.97    |         |
| Mean (SF)  | 0.41        | 16.87    | 0.53        | 16.52    |         |
| Mean (NSF) | 0.42        | 33.62    | 0.48        | 18.03    |         |

Table S1: **Model optimization.** For each patient the maximum correlation between the clinical and model seizure patterns, and the corresponding optimal network connectivity, for the broad-band (BB) networks, is given, both for the RA and SOZ seeds. The seizure outcome is also indicated. The final three rows indicate the average correlation and density obtained for the whole population (all), seizure free patients (SF) and not seizure free patients (NSF). \* Indicates a significant correlation ( $p < 0.05$ ).

smaller propagation at  $t_0$ . Averaging over a large number of realizations ( $10^4$  in the current case) minimizes this problem, but it can still occur. To avoid this artificial minimization, after accepting a new virtual resection  $\mathcal{R}$  the propagation  $I_{\mathcal{R}}(t_0)$  was calculated again with a new simulation of the SI dynamics. In this manner the realizations that were used to select a resection were not carried over in subsequent iterations. This step was not necessary in case of the surrogate model since the calculation of  $d_{\mathcal{R}}^{\text{seed}}$  is exact.

### 3 Reproduction of seizure propagation patterns: Results.

#### 3.1 Optimal correlation for BB networks.

In table S1 we report the optimal correlation found for each patient using the patient-specific BB-connectivity network, and the corresponding value of the mean connectivity.

#### 3.2 Results for $\alpha$ -band networks.

We report here on the results of the seizure propagation model fit and validation analysis for the  $\alpha$ -band networks. As described in the methods section of the main text, we measured the correlation  $C$  between the SI and SEEG propagation patterns for different values of the mean network connectivity  $\kappa$ . The resulting  $C(\kappa)$  curves are shown in figure S4, in panels (a) and (b) for the RA and SOZ seeds, respectively. As it was the case for the BB networks, we found a bimodal dependence of  $C(\kappa)$  for most patients, so that there is a maximum for low density values and another one for large densities. As before, we restricted our considerations to the first maximum, which leads to networks with only the fundamental connections that are needed to reproduce seizure propagation. Then, we found the connectivity value  $\kappa_{\text{max}}$  that led to the maximum correlation, independently for each patient. We found that the model significantly reproduced the seizure propagation patterns for 9 and 10 out of 10 patients for the RA and SOZ seeds, respectively. The maximum correlation  $C_{\text{max}}$  found for each patient is indicated in figure S4 with a triangle, and the corresponding values are reported in table S2 and figure S5.

We also report in figure S5 the optimal correlation found when using the average  $\alpha$ -band network and the fully connected network. The average values for each group are reported on the main text. Finally, in figure S4c we show the average model as given by the median correlation of  $C(\kappa)$  for all patients, for both the RA and SOZ seeds.

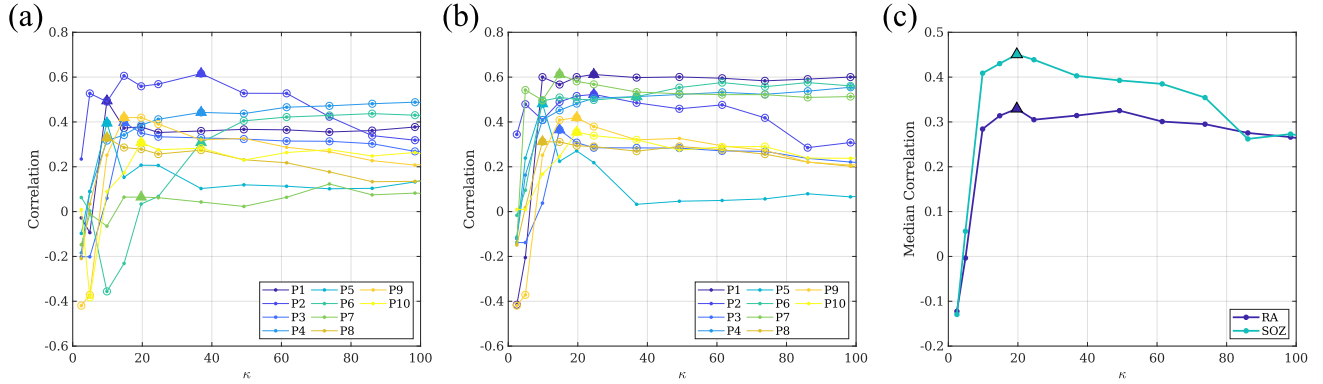

Figure S4: **Reproduction of seizure propagation.** Correlation between the modelled and clinically observed seizure propagation pattern as a function of network density, for each patient, using the RA (panel a) and SOZ seeds (panel b), for the alpha-band networks. Panel (c) indicates the median curves for each case, as indicated by the legend. Circles in panels (a) and (b) denote significant correlations ( $p < 0.05$ ), and the optimal correlation for each case is marked with a triangle.

| Patient    | RA Seed     |          | SOZ Seed    |          | Outcome |
|------------|-------------|----------|-------------|----------|---------|
|            | Correlation | $\kappa$ | Correlation | $\kappa$ |         |
| P1         | 0.49*       | 9.84     | 0.61*       | 24.60    | NSF     |
| P2         | 0.62*       | 36.90    | 0.52*       | 24.60    | SF      |
| P3         | 0.40*       | 14.75    | 0.36*       | 14.75    | NSF     |
| P4         | 0.44*       | 36.90    | 0.51*       | 36.90    | SF      |
| P5         | 0.39*       | 9.84     | 0.48*       | 9.84     | SF      |
| P6         | 0.31*       | 36.90    | 0.51*       | 36.90    | SF      |
| P7         | 0.06        | 19.68    | 0.61*       | 14.75    | SF      |
| P8         | 0.33*       | 9.84     | 0.31*       | 9.84     | NSF     |
| P9         | 0.42*       | 14.75    | 0.42*       | 19.68    | SF      |
| P10        | 0.31*       | 19.68    | 0.35*       | 19.68    | SF      |
| Mean (all) | 0.38        | 20.90    | 0.47        | 21.15    |         |
| Mean (SF)  | 0.36        | 24.90    | 0.49        | 23.19    |         |
| Mean (NSF) | 0.41        | 11.50    | 0.43        | 16.39    |         |

Table S2: **Model optimization.** For each patient, the maximum correlation between the clinical and modelled seizures patterns, and the corresponding optimal network connectivity, for the  $\alpha$ -band networks, is given for the RA and SOZ seeds. The seizure outcome is also indicated. The final three rows indicate the average correlation and density obtained for the whole population (all), seizure free patients (SF) and not seizure free patients (NSF). \* Indicates a significant correlation ( $p < 0.05$ ).

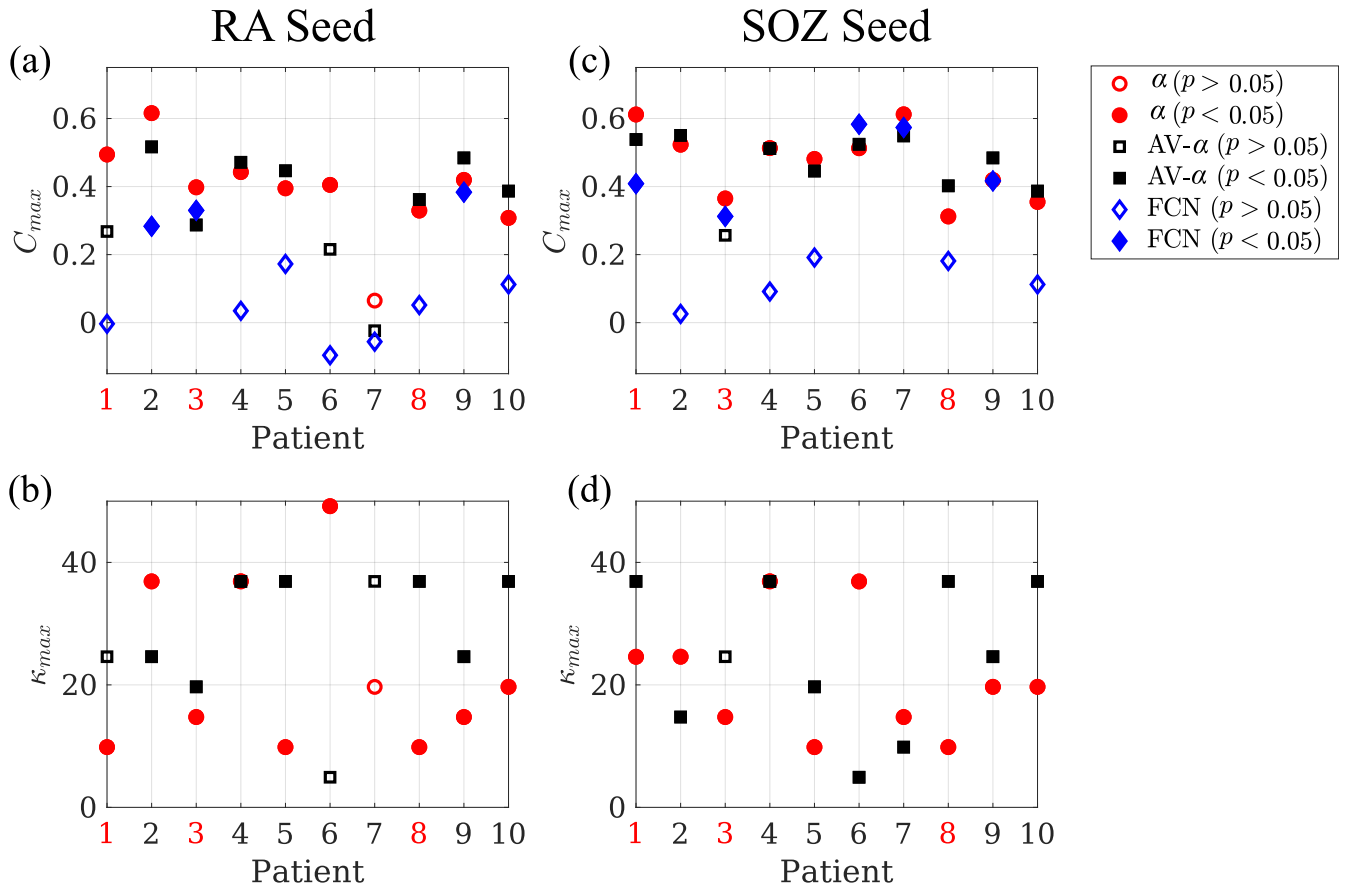

Figure S5: **Reproduction of seizure propagation patterns.** Panels (a) and (c) show the average maximum correlation  $C_{max}$  achieved by the individual  $\alpha$ -band networks ( $\alpha$ , red circles), and the average AB one (AV-BB, black squares), and the correlation found for the fully connected network (FCN, blue diamonds), respectively for the RA and SOZ seeds. Panels (b) and (d) show the corresponding  $\kappa_{max}$  for the individual (AB, red circles) and average (AV-AB, black squares) networks. Significant correlations ( $p < 0.05$ ) are indicated by a filled marker. NFS patients are indicated by red labels.



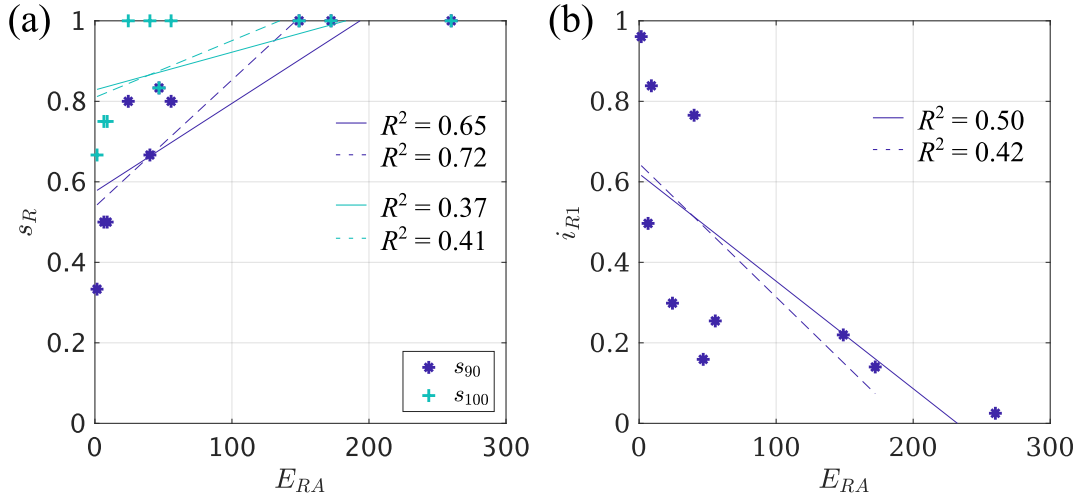

Figure S6: **Analysis of VR results.** (a) Dependence of the normalized size of the 90% and 100% resections (respectively  $s_{90}$  and  $s_{100}$ ) on the number of links of the resection area,  $E_{RA}$ . (b) Dependence of the normalized effect of the 1-node resection on  $E_{RA}$ . Solid lines indicate the fits to all data points, and dashed lines the fits without the outlier case, for both panels.

## 4 Analysis of VR results

Figure S6 reports the dependence of the normalized size of the 90% and 100% (panel a) and of the normalized effect of the 1-node resection (panel b) on the number of links of the resection area,  $E_{RA}$ .  $E_{RA}$  combines the effect of the size and connectivity of the resection area. We found that  $s_{90}$  and  $s_{100}$  correlated positively and significantly with  $E_{RA}$  ( $r(8) = 0.81$ ,  $p = 0.005$  and  $r(8) = 0.61$ ,  $p = 0.07$ , respectively for  $s_{90}$  and  $s_{100}$ ) although the correlation was only significant for  $s_{90}$ . We analyzed whether this effect was led by the outlier case with largest  $E_{RA}$  by removing it from the correlation analysis. The results ( $r(7) = 0.85$ ,  $p = 0.004$  and  $r(7) = 0.64$ ,  $p = 0.06$ , respectively for  $s_{90}$  and  $s_{100}$ ) indicate that this was not the case.  $i_{R1}$  correlated negatively and significantly with  $E_{RA}$  ( $r(8) = -0.71$ ,  $p = 0.02$ ), and the effect was also not led by the outlier case ( $r(7) = -0.65$ ,  $p = 0.05$ ). Thus, larger or more densely connected epileptogenic regions would require larger minimal resections, as expected.

## References

- [1] M. Ercsey-Ravasz et al. “A predictive network model of cerebral cortical connectivity based on a distance rule”. *Neuron* 80.1 (2013).
- [2] R. Gămănuț et al. “The mouse cortical connectome, characterized by an ultra-dense cortical graph, maintains specificity by distinct connectivity profiles”. *Neuron* 97.3 (2018).
- [3] P. Theodoni et al. “Structural attributes and principles of the neocortical connectome in the marmoset monkey”. *BioRxiv* (2020).
- [4] G. Deco et al. “Rare long-range cortical connections enhance human information processing”. *Current Biology* 31.20 (2021).
- [5] G. Deco and M. L. Kringelbach. “Turbulent-like dynamics in the human brain”. *Cell reports* 33.10 (2020).
- [6] J. A. Roberts et al. “Consistency-based thresholding of the human connectome”. *NeuroImage* 145 (2017).
- [7] D. Brockmann and D. Helbing. “The hidden geometry of complex, network-driven contagion phenomena”. *Science* 342.6164 (2013).
- [8] S. Kirkpatrick, C. D. Gelatt, and M. P. Vecchi. “Optimization by simulated annealing”. *Science* 220.4598 (1983).
